# Supplementary material for: Storage Drives Alterations of Proteomic and Protein Structural Properties in Rice (Oryza sativa L.)
Source: MDPI journal article supplement (doi:10.3390/foods11213541), 2022-11-07
Supplement: s1 [file s1]

# **Storage drives alterations of proteomic and protein structural properties in rice (*Oryza sativa* L.)**

Qian Wang, Dong Zhang, Jianlei Liu, Bo Shang, Xiaolaing Duan, Hui Sun\*

Academy of National Food and Strategic Reserves Administration, Beijing 100037,

PR China

\*Corresponding author:

Dr. Hui Sun

Academy of National Food and Strategic Reserves Administration

No. 11, Baiwanzhuang street, Xicheng district, Beijing, P. R. China

Ph: 86-13601375755    E-mail: [sh@ags.ac.cn](mailto:sh@ags.ac.cn)

## **Supplementary Materials**

Table S1 Liquid chromatography gradient elution program of separation of polypeptide fraction.

| RT (min) | Flow Rate (mL/min) | Mobile Phase A (%) | Mobile Phase B (%) |
|----------|--------------------|--------------------|--------------------|
| 0        | 1                  | 97                 | 3                  |
| 10       | 1                  | 95                 | 5                  |
| 30       | 1                  | 80                 | 20                 |
| 48       | 1                  | 60                 | 40                 |
| 50       | 1                  | 50                 | 80                 |
| 53       | 1                  | 30                 | 70                 |
| 54       | 1                  | 0                  | 100                |

Table S2 Liquid chromatography gradient elution program.

| RT (min) | Flow Rate (nL/min) | Mobile Phase A (%) | Mobile Phase B (%) |
|----------|--------------------|--------------------|--------------------|
| 0        | 600                | 94                 | 6                  |
| 2        | 600                | 85                 | 15                 |
| 48       | 600                | 60                 | 40                 |
| 50       | 600                | 50                 | 50                 |
| 51       | 600                | 45                 | 55                 |
| 60       | 600                | 0                  | 100                |

Table S3 Parameters of Proteome Discoverer software.

| Item                      | Value                                                            |
|---------------------------|------------------------------------------------------------------|
| Type of Quantification    | Reporter Quantification(TMT)                                     |
| Enzyme                    | Trypsin                                                          |
| Max.Missed Cleavage Sites | 2                                                                |
| Precursor Mass Tolerance  | 10 ppm                                                           |
| Fragment Mass Tolerance   | 0.02 Da                                                          |
| Dynamic Modification      | Oxidation/+15.995 Da (M) and TMT /+229.163 Da (K,Y)              |
| N-Terminal Modification   | Acetyl/+42.011 Da (N-Terminal) and TMT /+229.163 Da (N-Terminal) |
| Static Modification       | Carbamidomethyl/+57.021 Da (C)                                   |

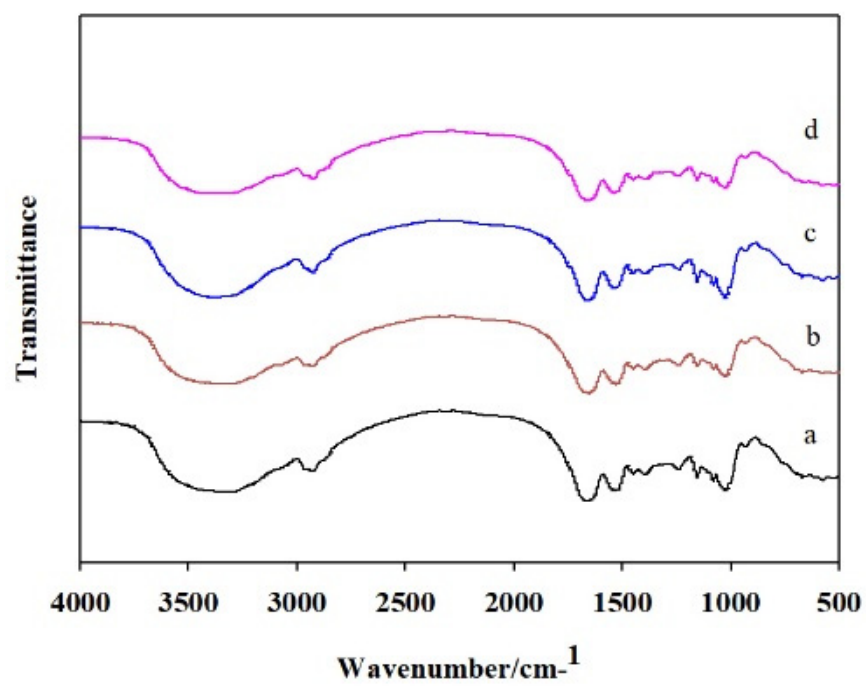

**Figure S1.** Effect of storage on Fourier transform infrared spectroscopy of rice protein. (a) NJF; (b) NJS; (c) JZF; (d) JZS.

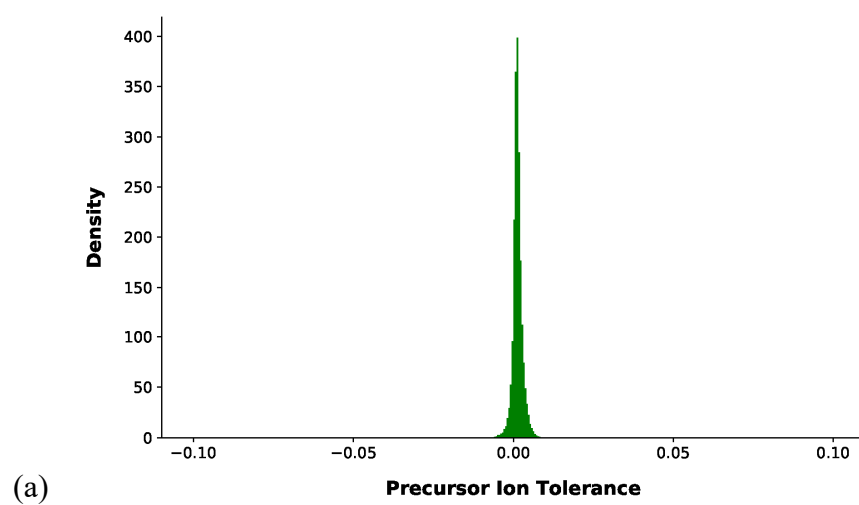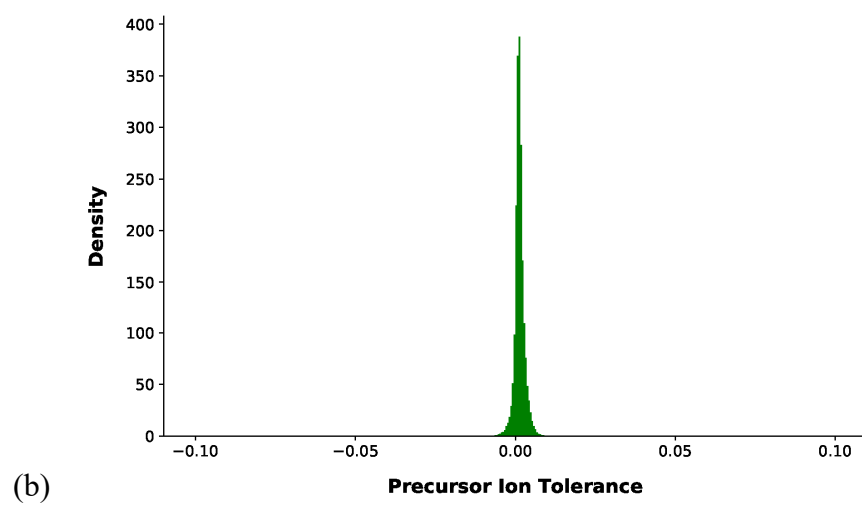

**Figure S3.** Tolerance distribution of parent ion mass in JZ (a) and NJ (b).

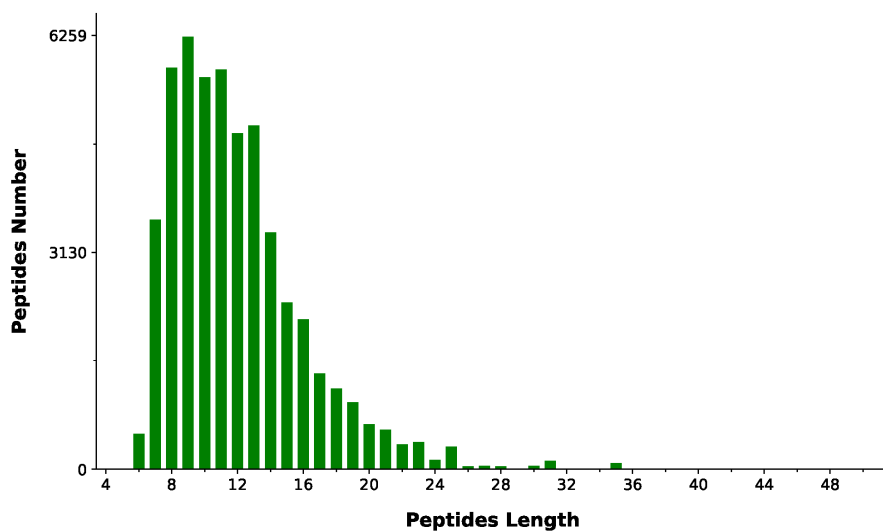

(a)

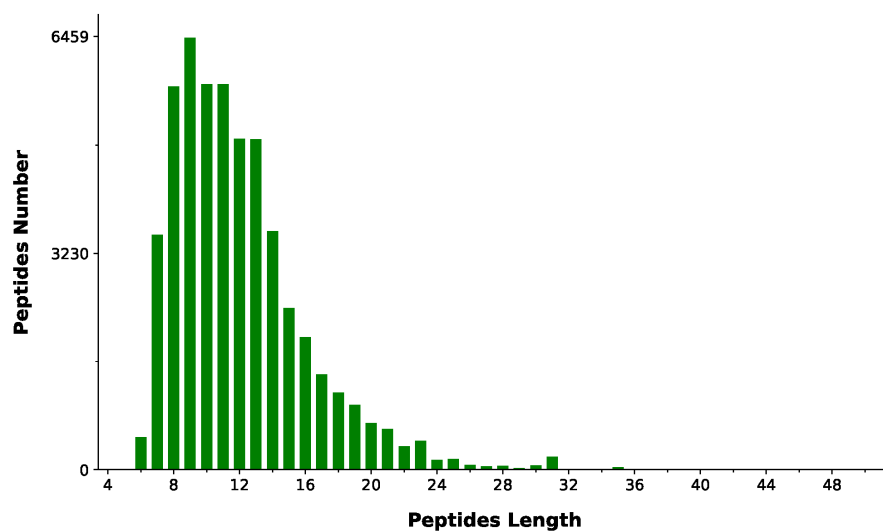

(b)

**Figure S4.** Distribution map of peptide length range in JZ (a) and NJ (b).

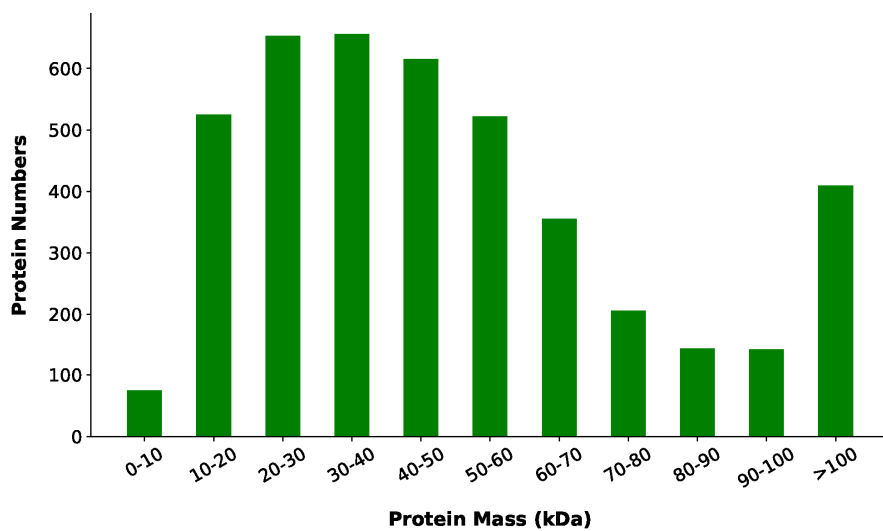

(a)

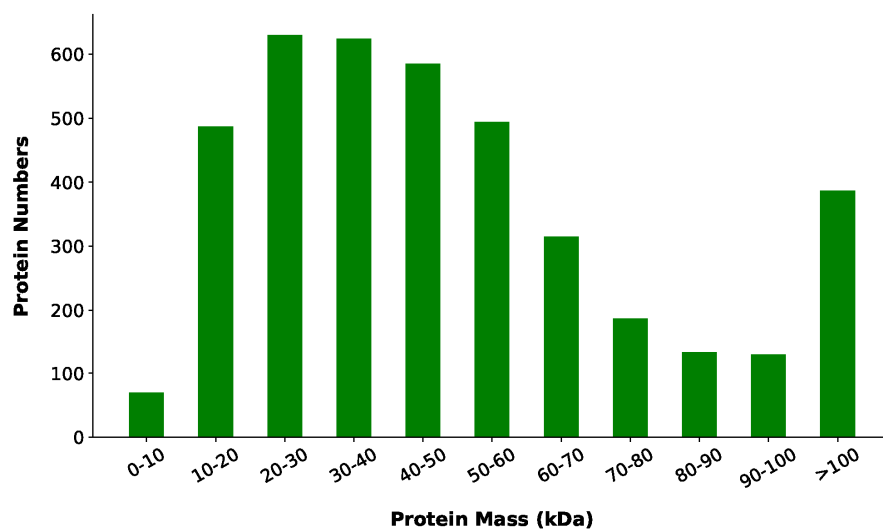

(b)

**Figure S5.** Protein coverage distribution in JZ (a) and NJ (b).



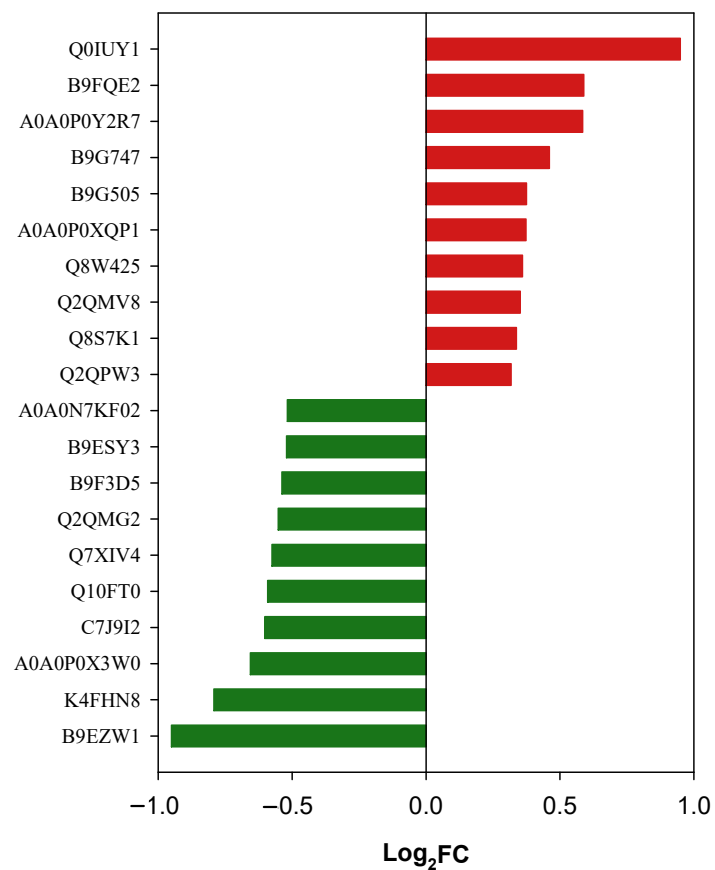

(a)

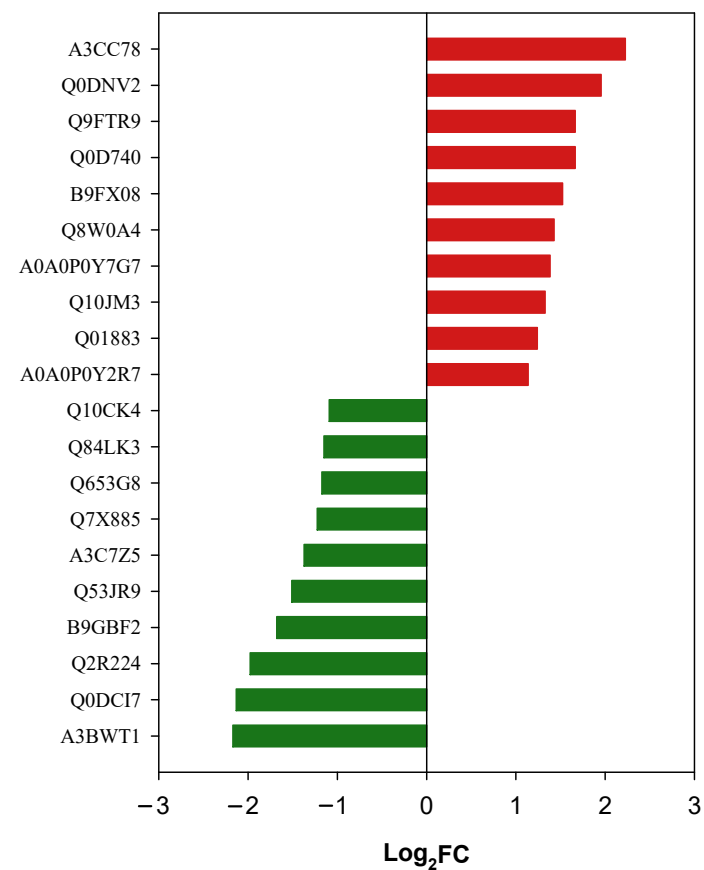

(b)

**Figure S6.** Protein variation between stored rice compared with fresh rice. (a) Up-regulation/down-regulation of the top 10 DEPs in JZ; (b) Up-regulation/down-regulation of the top 10 DEPs in NJ.

The mass spectrometry proteomics data have been deposited to the ProteomeXchange Consortium via the PRIDE [1] partner repository with the dataset identifier PXD037810.

[1] <http://www.ebi.ac.uk/pride>
